# Supplementary material for: Random allogeneic blood transfusion in pigs: characterisation of a novel experimental model
Source: PeerJ. 2019 Aug 16;7:e7439. doi: 10.7717/peerj.7439 (PMC6699485; doi:10.7717/peerj.7439)
Supplement: Dataset 55 [file peerj-07-7439-s005.xlsx]

## Sheet: IL 6
IL-6					Parameters are displayed are presented as pg/mL.
SHAM
	BLH	T4	T8
49-1	105.9	58.7	67.6
49-7	57	30.3	6.9
49-10	0	28.1	0
49-12	64.8	19.1	5.8
Mittelwert	56.925	34.05	20.075
Standardabw.	43.5929	17.1327	31.8276
Median	60.9	29.2	6.35
Transfusion
	BLH	T4	T8
49-2	143.4	111.8	410
49-3	376.5	49.1	0
49-4	147.4	32.2	21.7
49-5	276.8	15.2	20.7
49-6	0	38.8	55.6
49-8	0	19	23.7
49-9	0	0	3.1
49-11	25.8	0	1.5
Mittelwert	121.237	33.2625	67.0375
Standardabw.	143.297	36.2397	139.751
Median	84.6	25.6	21.2

## Sheet: TNFalpha
TNFalpha					Parameters are displayed are presented as pg/mL.
SHAM
	BLH	T4	T8
49-1	371	119.7	117.2
49-7	126.1	94.6	88.1
49-10	>1500	697	321.4
49-12	>1500	555.8	360.2
Mittelwert	248.55	366.775	221.725
Standardabw.	173.17	305.453	138.914
Median	248.55	337.75	219.3
Transfusion
	BLH	T4	T8
49-2	94.3	152	187.9
49-3	652.9	288.9	168.8
49-4	682.2	180.8	118.1
49-5	>1500	582.7	266.7
49-6	164.3	116.2	110.6
49-8	335.3	247.7	136
49-9	545.1	500.9	211.8
49-11	439.9	164.9	109.6
Mittelwert	416.286	279.263	163.688
Standardabw.	230.064	172.314	56.2232
Median	439.9	214.25	152.4
