# Supplementary material for: Random allogeneic blood transfusion in pigs: characterisation of a novel experimental model
Source: PeerJ. 2019 Aug 16;7:e7439. doi: 10.7717/peerj.7439 (PMC6699485; doi:10.7717/peerj.7439)
Supplement: Dataset S1 [file peerj-07-7439-s001.xlsx]

## Sheet: Summary
pulmonary Histopathology
	Level-1	Level-2	Level-3	Level-4	Median	Mean		Groups	Control	Transfusion		Excluded		Control	Level-1	Level-2	Level-3	Level-4	Median	Mean		Mean	STABW		Level 1 = dependent periphery
Experiment 1	6	7	14	8	7.5	8.75			Experiment 1	Experiment 2		Experiment 3		Experiment 1	6	7	14	8	7.5	8.75		10.25	0.935414		Level 2 = dependent central
Experiment 2	13	16	12	15	14	14			Experiment 7	Experiment 4				Experiment 7	8	12	11	10	10.5	10.25					Level 3 = non-dependent central
Experiment 3	7	9	9	9	9	8.5			Experiment 10	Experiment 5				Experiment 10	13	9	11	12	11.5	11.25					Level 4 = non-dependent periphery
Experiment 4	11	12	16	13	12.5	13			Experiment 12	Experiment 6				Experiment 12	10	14	11	8	10.5	10.75
Experiment 5	11	9	11	6	10	9.25				Experiment 8
Experiment 6	11	4	2	6	5	5.75				Experiment 9
Experiment 7	8	12	11	10	10.5	10.25				Experiment 11
Experiment 8	9	11	9	10	9.5	9.75								Transfusion	Level-1	Level-2	Level-3	Level-4	Median	Mean		Mean	STABW
Experiment 9	18	9	8	14	11.5	12.25								Experiment 2	13	16	12	15	14	14		11.2143	2.89528
Experiment 10	13	9	11	12	11.5	11.25								Experiment 4	11	12	16	13	12.5	13
Experiment 11	15	15	16	12	15	14.5								Experiment 5	11	9	11	6	10	9.25
Experiment 12	10	14	11	8	10.5	10.75								Experiment 6	11	4	2	6	5	5.75
														Experiment 8	9	11	9	10	9.5	9.75
														Experiment 9	18	9	8	14	11.5	12.25
														Experiment 11	15	15	16	12	15	14.5
														Excluded	Level-1	Level-2	Level-3	Level-4	Median	Mean
														Experiment 3	7	9	9	9	9	8.5

## Sheet: Experiment 1
	Score per field (400x)
	Assessment 0 to 5:										Level 1 = dependent periphery
		Level 1		Level 2		Level 3		Level 4			Level 2 = dependent central
	alveolar edema	0	0	0	0	0	0	0	0		Level 3 = non-dependent central
		1	0	0	0	0	0	0	0		Level 4 = non-dependent periphery
	interstitial edema	1	2	0	1	1	1	0	1
		1	1	1	1	1	0	1	0		each value represent a different field of views
	hemorrhage	0	0	0	0	0	0	0	0
		0	0	0	0	0	0	0	0		MD = Median
	infl. infiltration	4	0	0	0	0	0	0	0		ME = Mean
		1	1	0	1	0	0	0	1
	epithelial destruction	0	0	0	0	0	0	0	1
		0	0	0	0	0	0	1	0
	microatelectasis	2	0	0	2	0	1	1	3
		1	1	0	1	0	1	3	0
	overdistension	0	1	1	0	1	0	1	0
		0	1	1	0	1	1	0	1
		1	2	3	4
	Sum	18	9	8	14
						MD	ME
	Sum	18	9	8	14	11.5	12.25
		1	2	3	4

## Sheet: Experiment 2
	Score per field (400x)
	Assessment 0 to 5:										Level 1 = dependent periphery
		Level 1		Level 2		Level 3		Level 4			Level 2 = dependent central
	alveolar edema	0	0	0	1	0	0	1	1		Level 3 = non-dependent central
		0	0	0	0	0	1	0	0		Level 4 = non-dependent periphery
	interstitial edema	0	1	1	2	1	1	1	1
		2	1	0	1	1	1	0	1		each value represent a different field of views
	hemorrhage	0	0	0	0	0	0	1	0
		0	0	0	0	0	0	0	0		MD = Median
	infl. infiltration	1	1	1	0	1	1	1	1		ME = Mean
		1	0	1	1	0	1	0	0
	epithelial destruction	1	0	1	1	0	0	0	0
		0	1	0	2	0	1	1	1
	microatelectasis	1	0	1	1	0	1	3	1
		0	0	0	0	1	0	0	1
	overdistension	0	1	1	1	0	0	0	0
		1	1	0	0	0	1	0	0
		1	2	3	4
	Sum	13	16	12	15
						MD	ME
	Sum	13	16	12	15	14	14
		1	2	3	4

## Sheet: Experiment 4
	Score per field (400x)
	Assessment 0 to 5:										Level 1 = dependent periphery
		Level 1		Level 2		Level 3		Level 4			Level 2 = dependent central
	alveolar edema	0	1	0	0	1	0	0	1		Level 3 = non-dependent central
		1	0	0	1	1	0	1	1		Level 4 = non-dependent periphery
	interstitial edema	1	1	2	1	1	1	1	1
		0	0	0	1	0	0	0	0		each value represent a different field of views
	hemorrhage	1	0	0	0	0	0	1	0
		0	0	0	0	1	0	1	0		MD = Median
	infl. infiltration	0	1	0	1	0	1	0	1		ME = Mean
		1	0	2	0	0	1	1	0
	epithelial destruction	0	0	0	1	0	0	0	0
		0	0	0	0	0	0	0	1
	microatelectasis	0	0	0	1	1	0	0	1
		0	1	0	0	3	0	1	0
	overdistension	1	1	1	0	1	1	1	0
		1	0	1	0	0	3	0	0
		1	2	3	4
	Sum	11	12	16	13
						MD	ME
	Sum	11	12	16	13	12.5	13
		1	2	3	4

## Sheet: Experiment 5
	Score per field (400x)
	Assessment 0 to 5:										Level 1 = dependent periphery
		Level 1		Level 2		Level 3		Level 4			Level 2 = dependent central
	alveolar edema	0	0	0	0	0	0	0	0		Level 3 = non-dependent central
		0	0	0	0	1	0	0	0		Level 4 = non-dependent periphery
	interstitial edema	1	1	1	1	1	1	1	0
		1	1	0	1	0	1	1	1		each value represent a different field of views
	hemorrhage	0	0	0	0	0	0	0	0
		0	0	0	0	1	0	0	0		MD = Median
	infl. infiltration	0	0	0	0	0	1	1	0		ME = Mean
		1	0	1	1	1	0	1	0
	epithelial destruction	0	0	0	0	0	0	0	0
		0	0	0	0	0	0	0	0
	microatelectasis	2	1	2	0	0	0	0	0
		1	1	0	0	3	1	0	1
	overdistension	0	0	0	1	0	0	0	0
		0	1	1	0	0	0	0	0
		1	2	3	4
	Sum	11	9	11	6
						MD	ME
	Sum	11	9	11	6	10	9.25
		1	2	3	4

## Sheet: Experiment 6
	Score per field (400x)
	Assessment 0 to 5:										Level 1 = dependent periphery
		Level 1		Level 2		Level 3		Level 4			Level 2 = dependent central
	alveolar edema	0	0	0	0	0	2	0	0		Level 3 = non-dependent central
		0	0	0	0	0	0	1	0		Level 4 = non-dependent periphery
	interstitial edema	0	1	1	0	1	1	1	0
		0	0	1	1	0	0	0	1		each value represent a different field of views
	hemorrhage	0	0	0	0	0	0	0	0
		0	0	0	0	0	0	0	0		MD = Median
	infl. infiltration	1	1	2	0	0	1	0	0		ME = Mean
		0	1	1	0	1	0	0	0
	epithelial destruction	0	0	0	0	0	0	0	0
		0	0	0	0	0	0	1	0
	microatelectasis	0	1	0	0	2	4	0	0
		0	0	0	0	1	0	4	0
	overdistension	0	0	0	0	0	0	0	0
		0	1	1	0	0	1	0	0
		1	2	3	4
	Sum	6	7	14	8
						MD	ME
	Sum	6	7	14	8	7.5	8.75
		1	2	3	4

## Sheet: Experiment 7
	Score per field (400x)
	Assessment 0 to 5:										Level 1 = dependent periphery
		Level 1		Level 2		Level 3		Level 4			Level 2 = dependent central
	alveolar edema	0	0	0	1	0	0	0	0		Level 3 = non-dependent central
		0	0	0	0	0	0	0	1		Level 4 = non-dependent periphery
	interstitial edema	1	1	0	0	1	0	1	1
		0	0	0	0	1	1	0	0		each value represent a different field of views
	hemorrhage	0	0	0	1	0	0	0	0
		0	0	0	0	0	0	0	1		MD = Median
	infl. infiltration	1	0	0	0	0	0	1	0		ME = Mean
		0	1	0	1	0	1	1	0
	epithelial destruction	0	0	0	0	0	0	0	0
		0	0	0	0	0	0	0	0
	microatelectasis	0	0	0	4	1	0	1	0
		0	1	1	1	1	1	1	0
	overdistension	0	1	1	0	1	1	1	1
		1	1	1	1	1	1	0	0
		1	2	3	4
	Sum	8	12	11	10
						MD	ME
	Sum	8	12	11	10	10.5	10.25
		1	2	3	4

## Sheet: Experiment 8
	Score per field (400x)
	Assessment 0 to 5:										Level 1 = dependent periphery
		Level 1		Level 2		Level 3		Level 4			Level 2 = dependent central
	alveolar edema	0	0	0	0	0	0	0	0		Level 3 = non-dependent central
		0	0	0	0	1	0	0	0		Level 4 = non-dependent periphery
	interstitial edema	1	1	1	0	1	0	0	1
		1	0	1	1	0	1	0	1		each value represent a different field of views
	hemorrhage	0	0	0	0	0	0	0	0
		0	0	0	0	0	0	0	0		MD = Median
	infl. infiltration	0	0	1	1	1	1	0	1		ME = Mean
		1	0	0	1	0	1	1	0
	epithelial destruction	0	0	0	0	0	0	0	0
		1	0	0	0	0	0	0	0
	microatelectasis	0	1	0	1	´1	0	0	1
		0	0	1	0	2	0	0	1
	overdistension	1	1	1	1	0	1	1	1
		0	1	1	0	0	0	1	1
		1	2	3	4
	Sum	9	11	9	10
						MD	ME
	Sum	9	11	9	10	9.5	9.75
		1	2	3	4

## Sheet: Experiment 9
	Score per field (400x)
	Assessment 0 to 5:										Level 1 = dependent periphery
		Level 1		Level 2		Level 3		Level 4			Level 2 = dependent central
	alveolar edema	0	0	0	0	0	0	0	0		Level 3 = non-dependent central
		0	0	0	0	0	0	0	0		Level 4 = non-dependent periphery
	interstitial edema	0	2	0	0	0	0	1	1
		0	0	0	1	0	0	0	0		each value represent a different field of views
	hemorrhage	0	0	0	0	0	0	0	0
		0	0	0	0	0	0	0	0		MD = Median
	infl. infiltration	1	0	1	0	0	0	0	1		ME = Mean
		0	0	0	0	1	0	1	0
	epithelial destruction	0	0	0	0	0	0	0	0
		1	1	0	0	0	0	0	0
	microatelectasis	1	0	0	0	0	0	1	0
		0	1	0	0	0	0	1	0
	overdistension	1	1	0	1	0	0	0	0
		1	1	0	1	0	1	0	0
		1	2	3	4
	Sum	11	4	2	6
						MD	ME
	Sum	11	4	2	6	5	5.75
		1	2	3	4

## Sheet: Experiment 10
	Score per field (400x)
	Assessment 0 to 5:										Level 1 = dependent periphery
		Level 1		Level 2		Level 3		Level 4			Level 2 = dependent central
	alveolar edema	0	0	1	0	1	0	0	0		Level 3 = non-dependent central
		0	1	0	0	0	0	1	0		Level 4 = non-dependent periphery
	interstitial edema	0	0	1	0	1	0	0	1
		0	1	0	0	0	1	2	0		each value represent a different field of views
	hemorrhage	0	0	0	0	1	0	0	0
		0	0	0	0	0	0	0	0		MD = Median
	infl. infiltration	1	2	0	1	1	0	1	0		ME = Mean
		1	1	2	1	1	1	0	1
	epithelial destruction	0	0	0	0	0	0	0	0
		0	0	0	0	0	0	0	0
	microatelectasis	2	1	0	2	1	0	1	1
		0	3	0	1	0	0	1	1
	overdistension	0	0	0	0	0	1	1	1
		0	0	0	0	1	1	0	0
		1	2	3	4
	Sum	13	9	11	12
						MD	ME
	Sum	13	9	11	12	11.5	11.25
		1	2	3	4

[truncated: 2 more sheets: Experiment 11, Experiment 12]
