# Supplementary material for: Random allogeneic blood transfusion in pigs: characterisation of a novel experimental model
Source: PeerJ. 2019 Aug 16;7:e7439. doi: 10.7717/peerj.7439 (PMC6699485; doi:10.7717/peerj.7439)
Supplement: Dataset S4 [file peerj-07-7439-s004.xlsx]

## Sheet: Peak
Peak Ventialtion Pressure		Sham								Transfusion
			Experiment 1	Experiment 7	Experiment 10	Experiment 12	Mean	SD			Experiment 2	Experiment 4	Experiment 5	Experiment 6	Experiment 8	Experiment 9	Experiment 11	Mean	SD
		Baseline	18	15	13	16	15.5	1.80278		Baseline	16	16	20	15	16	16	19	16.8571	1.72615
		0h	19	16	15	17	16.75	1.47902		0h	18	17	21	17	18	17	21	18.4286	1.67819
		1h	19	15	14	17	16.25	1.92029		1h	18	18	22	16	18	18	21	18.7143	1.90595
		2h	19	16	14	17	16.5	1.80278		2h	18	19	22	17	18	18	21	19	1.69031
		3h	19	16	14	17	16.5	1.80278		3h	17.5	19	22	17	18	19	23	19.3571	2.1165
		4h	21	16	14	18	17.25	2.58602		4h	18	20	22	17	18	18	24	19.5714	2.3819
		5h	21	17	14	18	17.5	2.5		5h	18.5	20	23	17	18	18	23	19.6429	2.27901
		6h	22	17	14	19	18	2.91548		6h	19	20	23	18	19	18	22	19.8571	1.80702
		7h	22	18	15	19	18.5	2.5		7h	19	21	21	18	18	19	24	20	2
		8h	22	18	15	19	18.5	2.5		8h	20	20	22	19	17	19	24	20.1429	2.09956
		Transfusion	17 (2)	18 (2)	20 (2)	20 (2)
		Control	16 (2)	17 (1)	17 (3)	19 (3)

## Sheet: PEEP
PEEP		Sham								Transfusion
			Experiment 1	Experiment 7	Experiment 10	Experiment 12	Mean	SD			Experiment 2	Experiment 4	Experiment 5	Experiment 6	Experiment 8	Experiment 9	Experiment 11	Mean	SD
		Baseline	4	4	4	4	4	0		Baseline	4	4	4	4	4	4	4	4	0
		0h	4	4	4	4	4	0		0h	4	4	4	4	4	4	4	4	0
		1h	4	4	4	4	4	0		1h	4	4	4	4	4	4	4	4	0
		2h	4	4	4	4	4	0		2h	4	4	4	4	4	4	4	4	0
		3h	4	4	4	4	4	0		3h	4	4	4	4	4	4	4	4	0
		4h	4	4	4	4	4	0		4h	4	4	4	4	4	4	4	4	0
		5h	4	4	4	4	4	0		5h	4	4	4	4	4	4	4	4	0
		6h	4	4	4	4	4	0		6h	4	4	4	4	4	4	4	4	0
		7h	4	4	4	4	4	0		7h	4	4	4	4	4	4	4	4	0
		8h	4	3	4	4	3.75	0.433013		8h	4	4	4	4	4	4	4	4	0
		Transfusion	4 (0)	4 (0)	4 (0)	4 (0)
		Control	4 (0)	4 (0)	4 (0)	4 (0)

## Sheet: Pmean
Mean Ventilation Pressure		Sham								Transfusion
			Experiment 1	Experiment 7	Experiment 10	Experiment 12	Mean	SD			Experiment 2	Experiment 4	Experiment 5	Experiment 6	Experiment 8	Experiment 9	Experiment 11	Mean	SD
		Baseline	9.5	8	8	9	8.625	0.649519		Baseline	9	9	10	8	9	8	10	9	0.755929
		0h	-	8	8	9	8.33333	0.471405		0h	9	9	10	9	9	9	10	9.28571	0.451754
		1h	10	8	8	9	8.75	0.829156		1h	9	9	10	9	9	9	10	9.28571	0.451754
		2h	10	9	8	9	9	0.707107		2h	9	10	10	9	9	9	10	9.42857	0.494872
		3h	10	9	8	9	9	0.707107		3h	9	10	10	9	9	9	11	9.57143	0.728431
		4h	10	9	8	9	9	0.707107		4h	9	10	10	9	9	9	11	9.57143	0.728431
		5h	11	9	8	9	9.25	1.08972		5h	9	10	10	9	9	9	10	9.42857	0.494872
		6h	10.5	9	8	9	9.125	0.892679		6h	9	10	10	9	9	9	10	9.42857	0.494872
		7h	11	9	9	9	9.5	0.866025		7h	9	10	10	10	9	9	11	9.71429	0.699854
		8h	11	9	9	9	9.5	0.866025		8h	10	10	10	10	9	9	11	9.85714	0.638877
		Transfusion	9 (1)	9 (0)	10 (1)	10 (1)
		Control	9 (1)	8 (0)	9 (1)	10 (1)

## Sheet: TV
Tidal Volume		Sham								Transfusion
			Experiment 1	Experiment 7	Experiment 10	Experiment 12	Mean	STABW			Experiment 2	Experiment 4	Experiment 5	Experiment 6	Experiment 8	Experiment 9	Experiment 11	Mean	STABW
		Baseline	8.7	6.3	4	6.4	6.35	1.66208		Baseline	5.1	6.5	5.4	6.2	7.2	6.4	6.9	6.24286	0.702764
		0h		7.1	4	6.4	5.83333	1.32749		0h	5.1	6.6	5.4	6.2	7.2	5.5	6.9	6.12857	0.751597
		1h	8.5	7.1	4	6	6.4	1.64469		1h	5	7.3	5.4	6.1	7.2	5.5	6.8	6.18571	0.857619
		2h	8.5	7.2	4.1	6	6.45	1.61941		2h	5	8.1	5.3	6.2	5	5.5	7.2	6.04286	1.10951
		3h	8.6	7.1	4.1	6	6.45	1.64088		3h	5	8.1	5.4	6.2	6.3	5.5	6.8	6.18571	0.967218
		4h	8.9	7.1	4	5.6	6.4	1.81246		4h	5	8.1	5.4	6.2	6.2	5.5	6.9	6.18571	0.976039
		5h	8.45	7.2	4.1	5.6	6.3375	1.63988		5h	5.25	8.2	5.4	6.1	6.1	5.5	6.9	6.20714	0.966743
		6h	8.5	7.1	4.3	5.6	6.375	1.57698		6h	5.5	8.1	5.4	6.1	6.3	6.2	7.3	6.41429	0.898298
		7h	8.5	7.1	6.6	5.6	6.95	1.04523		7h	5.5	8.1	5.4	5.8	6.2	6.1	7	6.3	0.884792
		8h	8.5	7.2	5.2	5.6	6.625	1.31601		8h	5.5	8.1	5.5	5.8	6.2	6	7	6.3	0.875051
		Transfusion	6 (1)	6 (1)	6 (1)	6 (1)
		Control	6 (2)	6 (1)	6 (2)	7 (1)

## Sheet: FiO2
FiO2		Sham								Transfusion
			Experiment 1	Experiment 7	Experiment 10	Experiment 12	Mean	STABW			Experiment 2	Experiment 4	Experiment 5	Experiment 6	Experiment 8	Experiment 9	Experiment 11	Mean	STABW
		Baseline	39	39	39	39	39	0		Baseline	39	38	39	38	39	39	38	38.5714	0.494872
		0h		39	39	38	38.6667	0.471405		0h	38	39	39	39	39	39	39	38.8571	0.349927
		1h	39	39	39	38	38.75	0.433013		1h	39	39	39	39	39	39	38	38.8571	0.349927
		2h	39	39	39	39	39	0		2h	39	39	39	38	38	39	39	38.7143	0.451754
		3h	39	39	39	38	38.75	0.433013		3h	38.5	39	39	39	38	39	38	38.6429	0.440315
		4h	39	39	39	38	38.75	0.433013		4h	39	39	39	39	38	39	38	38.7143	0.451754
		5h	39	39	39	39	39	0		5h	38.5	39	39	39	38	39	38	38.6429	0.440315
		6h	39	39	38	39	38.75	0.433013		6h	43.5	39	39	39	39	39	39	39.6429	1.57467
		7h	39	38	39	39	38.75	0.433013		7h	38	39	39	39	39	39	38	38.7143	0.451754
		8h	39	39	38	39	38.75	0.433013		8h	38.5	39	39	39	39	39	38	38.7857	0.364216
		Transfusion	39 (0)	39 (0)	39 (0)	39 (0)
		Control	39 (0)	39 (0)	39 (0)	39 (0)

## Sheet: Compliance
Compliance		Sham								Transfusion
			Experiment 1	Experiment 7	Experiment 10	Experiment 12	Mean	STABW			Experiment 2	Experiment 4	Experiment 5	Experiment 6	Experiment 8	Experiment 9	Experiment 11	Mean	STABW
		Baseline	17.7	19.6	25.5	17.7	20.125	3.19873		Baseline	19.6	17.7	13.7	20.6	22.6	21.6	16.7	18.9286	2.8704
		0h	-	19.6	22.6	17.7	19.9667	2.01715		0h	16.7	16.7	13.7	17.7	19.6	19.6	15.7	17.1	1.95302
		1h	16.7	19.6	24.5	16.7	19.375	3.18699		1h	16.7	14.7	12.7	17.7	19.6	18.6	14.7	16.3857	2.27811
		2h	15.7	18.6	23.5	17.7	18.875	2.86912		2h	16.7	14.7	12.7	17.7	20.6	18.6	15.7	16.6714	2.41467
		3h	15.7	18.6	24	16.7	18.75	3.20507		3h	17.2	14.7	13.7	17.7	20.6	17.7	13.7	16.4714	2.36324
		4h	15.7	18.6	23.5	16.7	18.625	3.00115		4h	16.7	13.7	13.7	17.7	19.6	18.6	13.7	16.2429	2.34695
		5h	13.7	17.7	24.5	15.7	17.9	4.06448		5h	16.2	13.7	12.7	16.7	19.6	18.6	13.7	15.8857	2.43863
		6h	13.7	17.7	24.5	16.7	18.15	3.95063		6h	15.7	13.7	12.7	16.7	19.6	18.6	16.7	16.2429	2.28527
		7h	13.7	16.7	23.5	15.7	17.4	3.68375		7h	15.7	13.7	13.7	16.7	19.6	18.6	13.7	15.9571	2.27273
		8h	13.2	16.7	22.6	16.7	17.3	3.37713		8h	15.2	13.7	13.7	16.7	21.6	17.7	13.7	16.0429	2.70547
		Transfusion	19 (3)	17 (2)	16 (2)	16 (3)
		Control	20 (3)	20 (2)	19 (3)	17 (3)

## Sheet: Resistance
Resistance		Sham								Transfusion
			Experiment 1	Experiment 7	Experiment 10	Experiment 12	Mean	STABW			Experiment 2	Experiment 4	Experiment 5	Experiment 6	Experiment 8	Experiment 9	Experiment 11	Mean	STABW
		Baseline	12	9	10	11	10.5	1.11803		Baseline	10	11	13	9	10	10	10	10.4286	1.17803
		0h		10	10	12	10.6667	0.942809		0h	11	12	12	10	11	11	11	11.1429	0.638877
		1h	13	9	10	13	11.25	1.78536		1h	11	14	13	10	11	11	11	11.5714	1.29363
		2h	13	10	10	13	11.5	1.5		2h	12	14	12	10	11	11	10	11.4286	1.29363
		3h	12	10	10	13	11.25	1.29904		3h	11	13	12	10	11	11	12	11.4286	0.903508
		4h	11	10	10	13	11	1.22474		4h	11	15	12	10	11	11	12	11.7143	1.48461
		5h	14	10	10	12	11.5	1.65831		5h	11.5	14	12	10	11	10	11	11.3571	1.27375
		6h	13	10	10	12	11.25	1.29904		6h	11.5	15	12	10	11	10	11	11.5	1.58114
		7h	13	10	9	12	11	1.58114		7h	11.5	15	12	10	11	10	12	11.6429	1.57467
		8h	14	10	9	12.5	11.375	1.98037		8h	11.5	14	12	10	11	10	12	11.5	1.28174
		Transfusion	10 (1)	11 (1)	12 (1)	12 (1)
		Control	11 (1)	11 (1)	11 (1)	11 (2)

## Sheet: exCO2
exspiratory CO2		Sham								Transfusion
			Experiment 1	Experiment 7	Experiment 10	Experiment 12	Mean	STABW			Experiment 2	Experiment 4	Experiment 5	Experiment 6	Experiment 8	Experiment 9	Experiment 11	Mean	STABW
		Baseline	39	40.875	30	30.75	35.1562	4.83426		Baseline	36	37.5	36	42.75	34.5	33.75	39.75	37.1786	2.9146
		0h		40.5	33	30	34.5	4.41588		0h	35.25	40.5	33.75	39.75	34.5	38.25	41.25	37.6071	2.84686
		1h	39.75	39.75	33	30	35.625	4.25918		1h	40.5	42	30.75	39	33	39	40.5	37.8214	3.925
		2h	40.5	37.5	35.25	27.75	35.25	4.71368		2h	43.5	40.5	32.25	41.25	36.75	39	36	38.4643	3.48832
		3h	40.5	36.75	36	26.25	34.875	5.26338		3h	40.125	39.75	36.75	42	40.5	39	37.5	39.375	1.66503
		4h	29.25	40.5	38.25	29.25	34.3125	5.12462		4h	41.625	39	41.25	40.5	40.5	41.25	38.25	40.3393	1.16633
		5h	39	38.25	41.25	28.5	36.75	4.8894		5h	39.375	38.25	41.25	40.5	40.5	42.75	37.5	40.0179	1.66158
		6h	38.25	37.5	42.75	30	37.125	4.57746		6h	39	38.25	40.5	39.75	39.75	43.5	33.75	39.2143	2.71052
		7h	37.5	36	34.5	29.25	34.3125	3.10934		7h	40.5	37.5	38.25	42	39.75	42.75	33.75	39.2143	2.82662
		8h	36	35.25	41.25	29.25	35.4375	4.25505		8h	40.5	37.5	37.5	39	41.25	42	33	38.6786	2.83068
		Transfusion	37 (3)	38 (3)	40 (1)	39 (3)
		Control	35 (5)	35 (4)	34 (5)	35 (4)

## Sheet: TV kgKG
TV kgKG		Sham								Transfusion
			Experiment 1	Experiment 7	Experiment 10	Experiment 12	Mean	STABW			Experiment 2	Experiment 4	Experiment 5	Experiment 6	Experiment 8	Experiment 9	Experiment 11	Mean	STABW
		Baseline	9.2308	7.0667	6.1515	7.6429	7.52297	1.12029		Baseline	8.32	7.8846	7.9615	7.3214	8.5333	7.6667	7.931	7.9455	0.369781
		0h	9.1538	7.4333	6.1515	7.6786	7.6043	1.06611		0h	8.52	7.8846	7.9231	7.3571	8.5667	7.6333	7.931	7.97369	0.406814
		1h	9.0769	7.4	6.1667	7.6429	7.57163	1.03371		1h	8.4	8.2308	7.9231	7.2679	8.6	7.6333	7.8276	7.98324	0.42718
		2h	9.1731	7.3667	6.2121	7.6786	7.60762	1.05609		2h	8.4	8.1923	7.8269	7.3571	8.3333	7.6667	8.2414	8.00253	0.362663
		3h	9.1923	7.3667	6.1212	7.6607	7.58522	1.0931		3h	8.34	8.2308	7.9231	7.3571	8.7	7.65	7.8276	8.00409	0.419218
		4h	9.5385	7.4167	6.1818	7.6786	7.7039	1.20059		4h	8.36	8.2308	8	7.3929	8.6333	7.6667	7.931	8.03067	0.389463
		5h	9.0385	7.4	6.1818	7.6964	7.57918	1.01589		5h	8.38	8.2308	8.0385	7.2857	8.5667	7.65	7.931	8.01181	0.40652
		6h	9.1923	7.4	6.5455	7.6964	7.70855	0.95519		6h	8.36	8.2308	8.0385	7.3571	8.7333	7.9	8.8966	8.21661	0.481195
		7h	9.0192	7.4	6.6818	7.6607	7.69042	0.846788		7h	8.32	8.2308	8.0385	7.3571	8.6333	7.8333	8.5862	8.14274	0.414096
		8h	9.0385	7.4667	6.303	7.6786	7.6217	0.971282		8h	8.4	8.2308	8.1154	7.3929	8.5667	7.7	8.6379	8.1491	0.423861
		Transfusion	8 (0)	8 (0)	8 (0)	8 (0)
		Control	8 (1)	8 (1)	8 (1)	8 (1)

## Sheet: FRC
FRC		Sham								Transfusion
			Experiment 1	Experiment 7	Experiment 10	Experiment 12	Mean	STABW			Experiment 2	Experiment 4	Experiment 5	Experiment 6	Experiment 8	Experiment 9	Experiment 11	Mean	STABW
		Baseline	1378	700.5	861	354	823.375	368.929		Baseline	671	1153.5	553	693.5	794.5	775	454.5	727.857	206.172
		0h		626	707	496.5	609.833	86.6933		0h	600.5	1257.5	486	580.5	703.5	797.5	413.5	691.286	259.629
		1h	917	653.5	728	592.5	722.75	121.985		1h	688	1368	478.5	615.5	620.5	727	408	700.786	291.518
		2h	1554	662.5	716.5	584	879.25	392.405		2h	662.5	1208	516.5	599	599.5	734	418	676.786	236.145
		3h	1572.5	672	770.5	538.5	888.375	403.47		3h	631.5	1146.5	499.5	612.5	538	744.5	476	664.071	214.235
		4h	675.5	622.5	798	599.5	673.875	76.78		4h	660	1245	485	625	576	731	512	690.571	239.504
		5h	1252.5	625.5	759.5	589.5	806.75	265.035		5h	630.5	1210.5	509.5	572	562	664.5	464	659	233.712
		6h	1390.5	604.5	780.5	541.5	829.25	335.668		6h	664.5	1230.5	521.5	579	559.5	650	541	678	230.938
		7h	1402	575.5	724.5	505.5	801.875	355.394		7h	693	1295.5	514	680.5	562	676	560.5	711.643	247.206
		8h	1379	625	682.5	464.5	787.75	350.582		8h	684.5	1261	502.5	695	585.5	710.5	557.5	713.786	234.883
		Transfusion	728 (206)	691 (260)	691 (240)	714 (235)
		Control	823 (369)	610 (87)	674 (77)	788 (351)
